# Supplementary material for: SCAPs Regulate Differentiation of DFSCs During Tooth Root Development in Swine
Source: PubMed Central journal article supplement — Int J Med Sci. 2018 Jan 19;15(4):291–9. doi: 10.7150/ijms.22495 (PMC5835700; doi:10.7150/ijms.22495), 2018-01-19
Supplement: ijmsv15p0291s1.pdf [file ijmsv15p0291s1.pdf]

## Supplementary files

**Table S1 Primers of genes for RT-PCR**

| <b>Gene name</b> | <b>Accession no.</b> | <b>Sense primer</b>    | <b>Antisense primer</b>  |
|------------------|----------------------|------------------------|--------------------------|
| WNT5a            | XM_005669660.1       | CTGGCAGGACTTTCTCAAGG   | GAGGTGTTATCCACCGTGCT     |
| $\beta$ -Catenin | NM_214367.1          | ACATGGCTATGGAGCCAGAC   | TTGGGTGGTATCCACATCCT     |
| ALP              | XM_005658458.1       | CCCAAAGGCTTCTTCTTGCTG  | GTGTGTCTTCCACGGAGGTCAT   |
| OCN              | NM_001164004.1       | AAAGGTGCAGCCTTCGTGT    | TGCCATAGAAGCGCCGATAG     |
| BSP-II           | XM_003129337.1       | GGCTTGAACCAACACCTCCAC  | TCTCGCTTTCGTAGATTTCGTATC |
| RUNX2            | XM_013977989.1       | CGCCTCACAAACAACCACAG   | TTGATGCCATAGTCCCTCCTT    |
| PLAP1            | NM_001243889.1       | TTCAACTGTGGAAGTGGAGGAT | CTGTTGGGCAGAAGTCATTCA    |
| FGF2             | XM_013978917.1       | GTTGTGGCTTACCCTCCCTTTG | CCGTTCGTTTCAGTGCCACAT    |
| COL-I            | XM_013149538.1       | GGCGGTTACGACTTGAGCTTC  | AGGCTCTTGAGGGTGGTGTCTA   |
| $\beta$ -Actin   | NM_001164650.1       | TGGTTCTGGGCTCTGTAAGGC  | TGATGCCGTGTTCTATTGGGTA   |

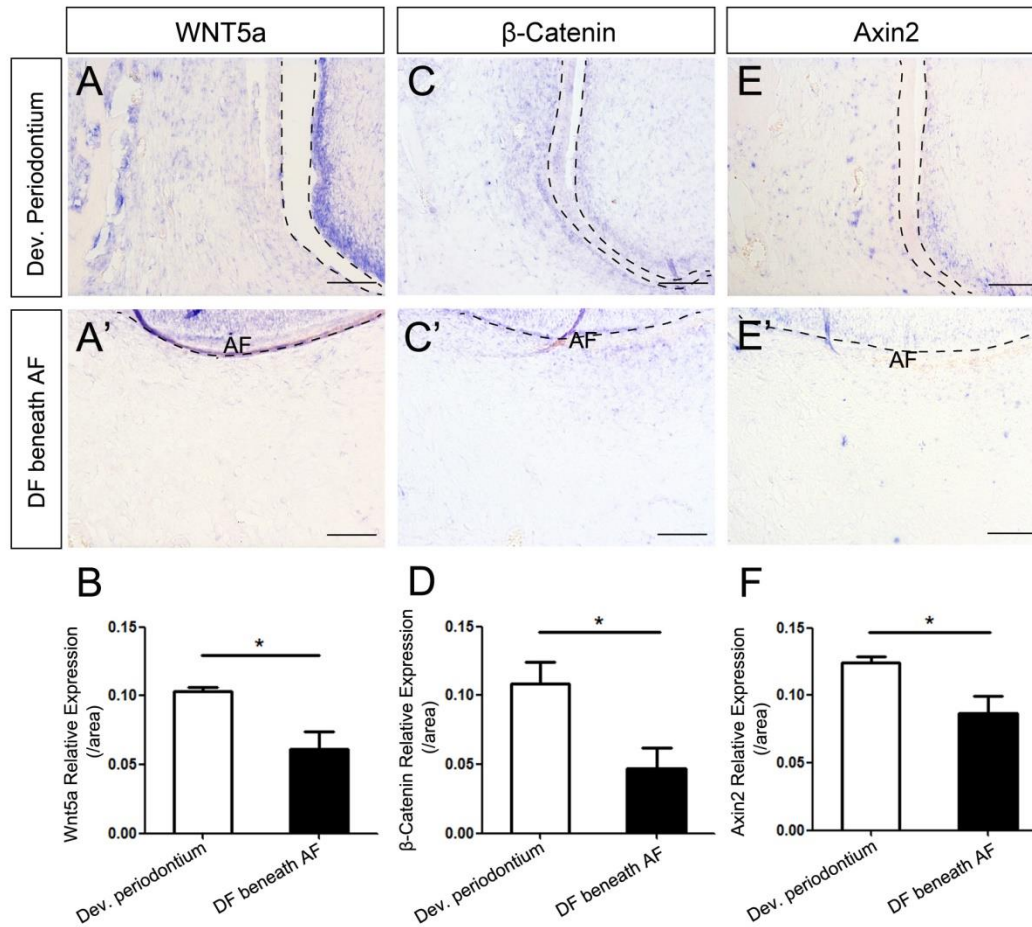

**Figure S1. Expression dynamics of *WNT5a*, *β-Catenin*, and *Axin2* in dental follicle and developing periodontium of DI3 of miniature pig.** In situ hybridization experiments were carried out to study the differences of expression patterns of *WNT5a*, *β-Catenin* and *Axin2* between developing periodontium (Dev. Periodontium) and dental follicle beneath apical foramen (DF beneath AF). (A, A', B) Expression pattern of *WNT5a* showed the expression level of Dev. Periodontium was higher than that of DF beneath AF (n=3,  $P < 0.05$ ). (C, C', D) Expression pattern of *β-Catenin* showed the expression level of Dev. Periodontium was higher than that of DF beneath AF (n=3,  $P < 0.05$ ). (E, E', F) Expression pattern of *Axin2* showed the expression level of Dev. Periodontium was higher than that of DF beneath AF (n=3,  $P < 0.05$ ). Scale bars represent 100 $\mu$ m (A, A', C, C', E, E').
